# Supplementary material
Source: PubMed Central journal article supplement (PMC7702477)
Supplement: bloodBLD2019004332-suppl1.pdf [file bloodBLD2019004332-suppl1.pdf]

## Supplemental Figures

### Supplemental Figure 1

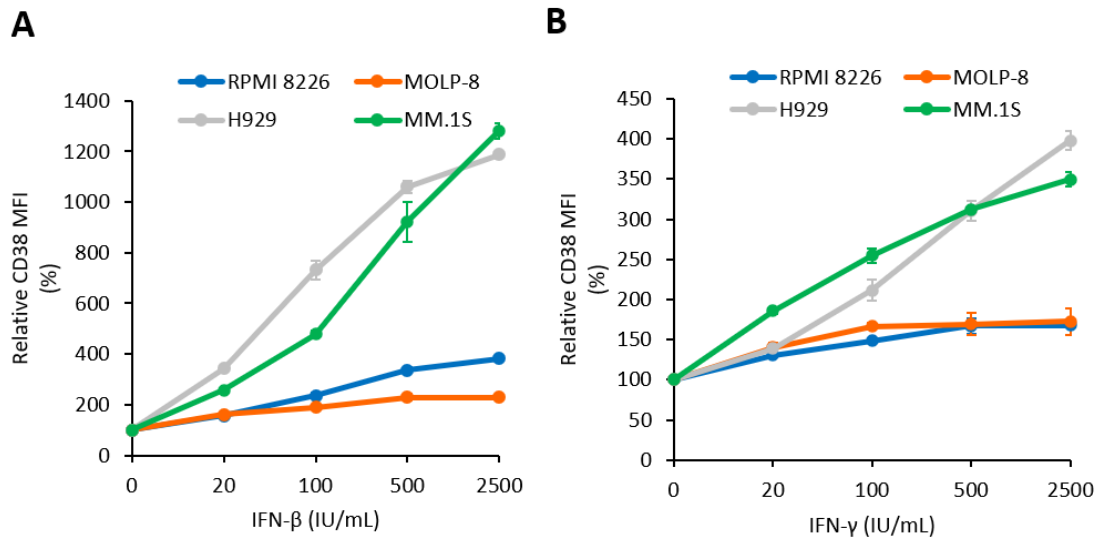

### Supplemental Figure 1. IFN- $\beta$ and IFN- $\gamma$ increase CD38 expression on MM cells. (A, B)

RPMI 8226, MOLP-8, H929, and MM.1S cells were cultured with IFN- $\beta$  (0 to 2500 IU/mL)

(A) or IFN- $\gamma$  (0 to 2500 IU/mL) (B) for 72h. After incubation, CD38 expression was measured

by flow cytometry, and relative CD38 MFI was calculated in comparison with MFI of Control.

Data are shown as mean  $\pm$  standard error of the mean.

## Supplemental Figure 2

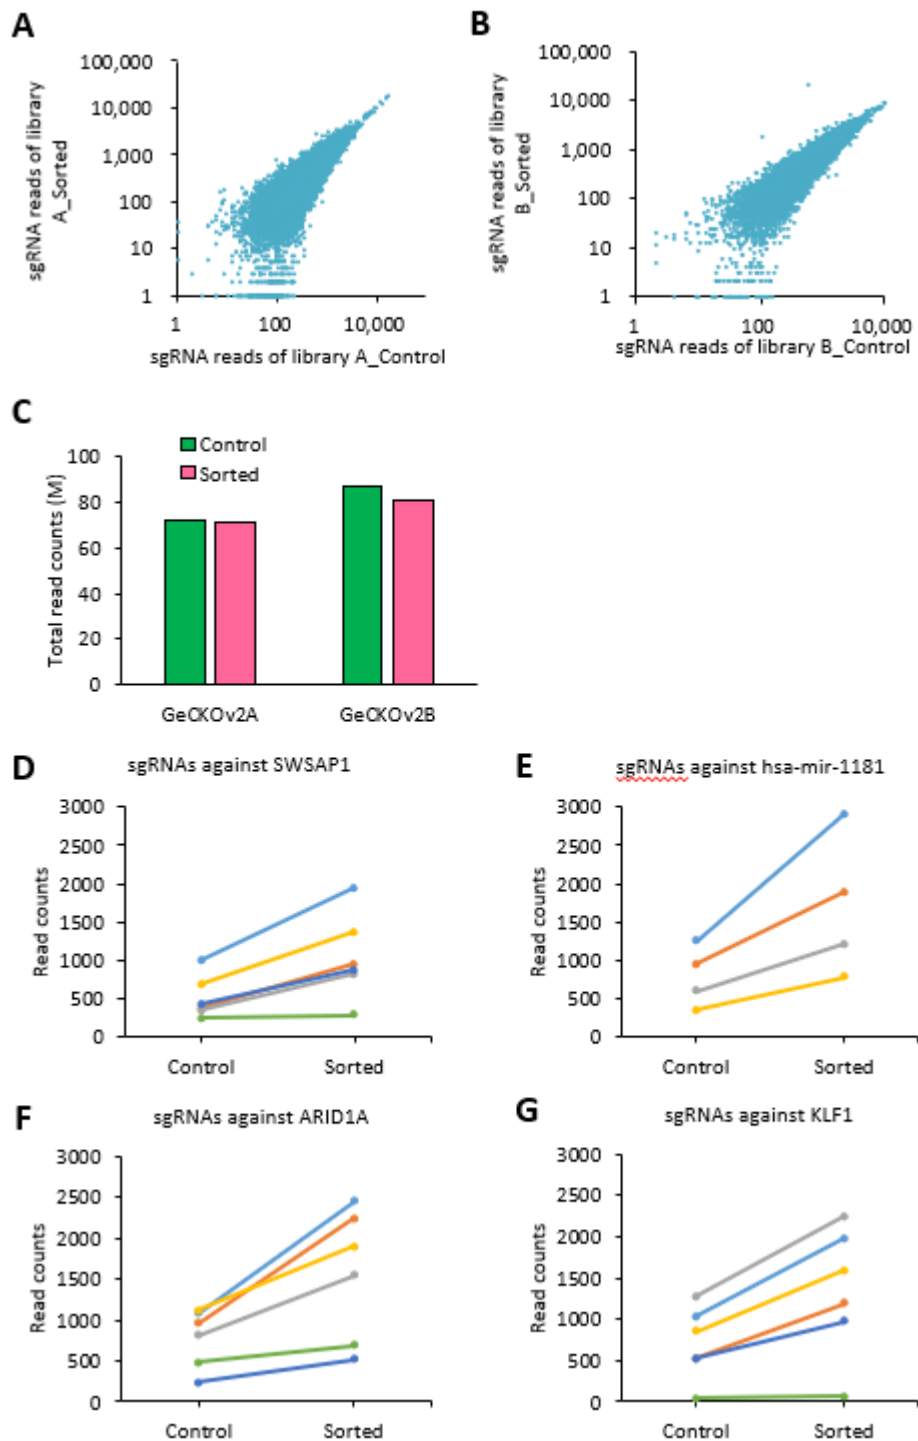

**Supplemental Figure 2. Genome-scale CRISPR-Cas9 knockout screening in RPMI**

**8226 cells.** (A, B) Scatter plot of sgRNA representation between control cells and sorted cells in the GeCKO library A (A) and library B (B). (C) Comparison of total sgRNA reads between control and sorted cells in two libraries. (D-G) Read counts in top 5 genes (*SWSAP1* (D), *hsa-mir-1181* (E), *ARID1A* (F), and *KLF1* (G)) enriched in sorted cells compared to control cells. *SWSAP1*, *SWIM-type zinc finger 7 associated protein 1*; *ARID1A*, *AT-rich interaction domain 1A*; *KLF1*, *Kruppel like factor 1*.

### Supplemental Figure 3

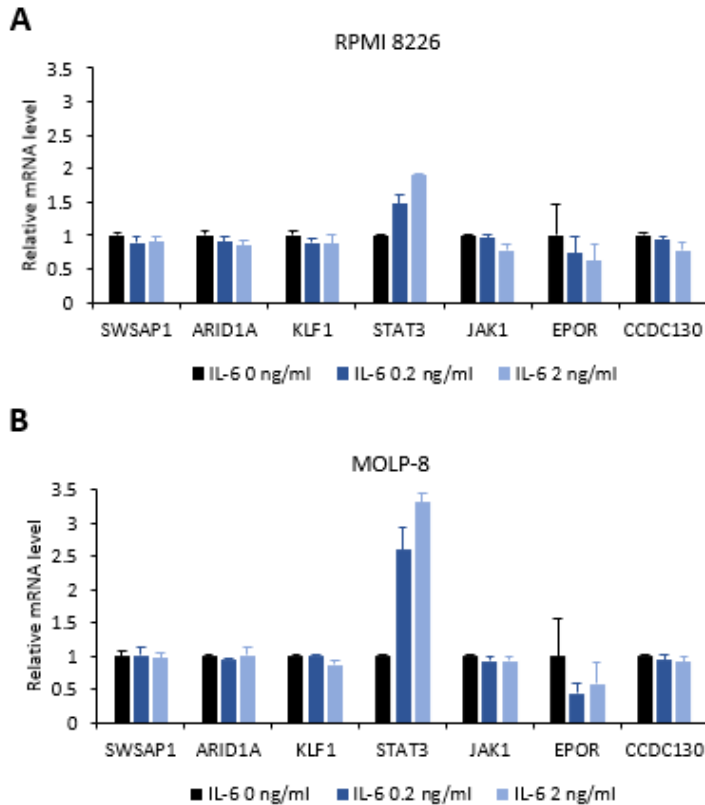

### Supplemental Figure 3. Validation of top positive genes identified by genome-scale

### CRISPR-Cas9 knockout screening. (A, B) qRT-PCR analysis of some genes in high

positive rank listed in Figure 3B was carried out in RPMI 8226 (A) and MOLP-8 cells (B)

treated with control culture medium or IL-6 (0.2 or 2 ng/ml) for 6 h. The values were

normalized to invariant control *GAPDH* expression. Data are shown as mean  $\pm$  standard

error of the mean. Specific primers for each gene are listed in Supplemental Table 2.

*SWSAP1*, SWIM-type zinc finger 7 associated protein 1; *ARID1A*, AT-rich interaction domain

1A; *KLF1*, Kruppel like factor 1; *JAK1*, Janus kinase 1; *EPOR*, Erythropoietin receptor, *CCDC130*, Coiled-coil domain containing 130; *GAPDH*, glyceraldehyde-3-phosphate dehydrogenase.

**Supplemental Figure 4**

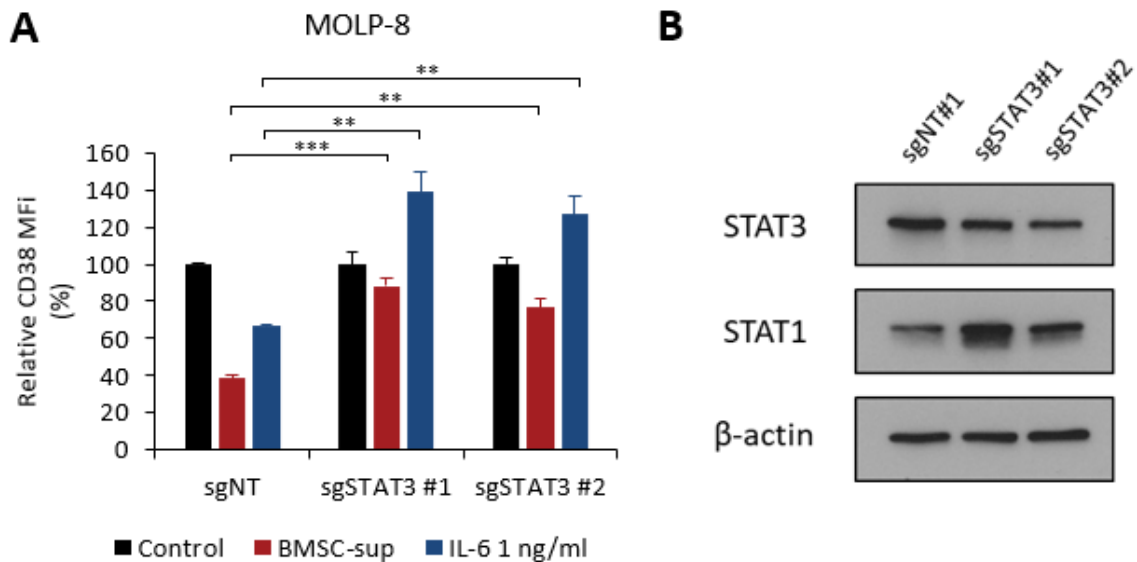

**Supplemental Figure 4. *STAT3* knockout inhibits CD38 downregulation induced by BMSC-sup or IL-6.** (A, B) MOLP-8 cells were infected with sgNT (non-target control), sgSTAT3 #1 or #2 expressing lentiviral vector, and cultured with control culture medium (Control), BMSC-sup or IL-6 (1 ng/ml) for 72 h. (A) CD38 expression was assessed by flow cytometry. Relative CD38 MFI was calculated in comparison with MFI of Control. (B) STAT3 downregulation was confirmed by immunoblotting.

## Supplemental Tables

**Supplemental Table 1. Antibodies used in this study**

| <b>Antibodies</b>      | <b>Sources</b>            | <b>Catalog #</b> | <b>Applications</b> |
|------------------------|---------------------------|------------------|---------------------|
| STAT1                  | Cell signaling technology | 9176             | WB                  |
| STAT3                  | Cell signaling technology | 9139             | WB                  |
| phospho-STAT1 (Tyr701) | Cell signaling technology | 7649             | WB                  |
| phospho-STAT3 (Tyr705) | Cell signaling technology | 9145             | WB                  |
| phospho-STAT3 (Ser727) | Cell signaling technology | 9134             | WB                  |
| FLAG-Tag               | Cell signaling technology | 14793            | WB                  |
| $\beta$ -actin-HRP     | Cell signaling technology | 12262            | WB                  |
| rabbit IgG-HRP         | Cell signaling technology | 7074             | WB (2nd Ab)         |
| mouse IgG-HRP          | Cell signaling technology | 7076             | WB (2nd Ab)         |
| CD38 PE/Cy7            | BioLegend                 | 356608           | FC                  |
| IgG1, $\kappa$ PE/Cy7  | BioLegend                 | 400126           | FC                  |
| CD138 BV421            | BioLegend                 | 356516           | FC                  |
| IgG1, $\kappa$ BV421   | BioLegend                 | 400158           | FC                  |
| 7-AAD                  | BD Pharmingen             | 559925           | FC                  |

WB, western blot; HRP, horseradish peroxidase; Ab, antibody; FC, flow cytometry; PE/Cy7, phycoerythrin-cyanin 7; BV421, Brilliant Violet 421; 7-AAD, 7-amino-actinomycin D.

**Supplemental Table 2. Primers for quantitative real-time PCR**

| <b>Target genes</b> | <b>Directions</b> | <b>Sequences (5' to 3')</b> |
|---------------------|-------------------|-----------------------------|
| <i>CD38</i>         | Forward           | CAGCAACAACCCTGTTTCAGT       |
| <i>CD38</i>         | Reverse           | CCATTGAGCATCACATGGAC        |
| <i>STAT3</i>        | Forward           | CCTCTGCCGGAGAAACAGT         |
| <i>STAT3</i>        | Reverse           | CATTGGGAAGCTGTCACTGTAG      |
| <i>SWSAP1</i>       | Forward           | GGAACGACTCTAGACCCAATGC      |
| <i>SWSAP1</i>       | Reverse           | CCTCATGGGCAGAGCACAGGA       |
| <i>ARID1A</i>       | Forward           | AAGCCACCAACTCCAGCATCCA      |
| <i>ARID1A</i>       | Reverse           | CGCTTCTGGAATGTGGAGTCAC      |
| <i>KLF1</i>         | Forward           | TTGCGGCAAGAGCTACACCAAG      |
| <i>KLF1</i>         | Reverse           | GTAGTGGCGGGTCAGCTCGTC       |
| <i>JAK1</i>         | Forward           | GAGACAGGTCTCCCACAAACAC      |
| <i>JAK1</i>         | Reverse           | GTGGTAAGGACATCGCTTTTCCG     |
| <i>EPOR</i>         | Forward           | TTCTGTGCTTCACCGAGCGGTT      |
| <i>EPOR</i>         | Reverse           | CGACACAGCTTCCATGGCTCAT      |
| <i>CCDC130</i>      | Forward           | CTCTCAACCGATACCACAACAGC     |
| <i>CCDC130</i>      | Reverse           | CATGCCGATGTGGTTCTTG CAG     |
| <i>GAPDH</i>        | Forward           | CCTGCACCACCAACTGCTT         |
| <i>GAPDH</i>        | Reverse           | CCATCACGCCACAGTTTCC         |

*SWSAP1*, SWIM-type zinc finger 7 associated protein 1; *ARID1A*, AT-rich interaction domain 1A; *KLF1*, Kruppel like factor 1; *JAK1*, Janus kinase 1; *EPOR*, Erythropoietin receptor; *CCDC130*, Coiled-coil domain containing 130; *GAPDH*, glyceraldehyde-3-phosphate dehydrogenase.



**Supplemental Table 3. Plasmid vectors used in this study**

| <b>Plasmids</b>      | <b>Sources</b> | <b>Catalog #</b> |
|----------------------|----------------|------------------|
| lentiCRISPR v2       | Addgene        | 52961            |
| pCMV-dR8.2 dvpr      | Addgene        | 8455             |
| pCMV-VSV-G           | Addgene        | 8454             |
| EF.STAT3DN.Ubc.GFP   | Addgene        | 24984            |
| EF.STAT3C.Ubc.GFP    | Addgene        | 24983            |
| MSCV IRES Luciferase | Addgene        | 18760            |

**Supplemental Table 4. sgRNAs used in this study**

| <b>Target genes</b> | <b>Vectors</b> | <b>Clone IDs</b> | <b>Target sequences</b> |
|---------------------|----------------|------------------|-------------------------|
| <i>STAT3</i>        | sgRNA          | HGLibA_47386     | AGATTGCCCGGATTGTGGCC    |
| <i>STAT3</i>        | sgRNA          | HGLibB_47330     | ACTGCTGGTCAATCTCTCCC    |
| <i>Non-target</i>   | sgRNA          | HGLibA_64388     | CCATATCGGGGCGAGACATG    |

sgRNA, single guide RNA.

**Supplemental Table 5. Relative CD38 mean fluorescence intensities of cytokine profiling in 4 MM cell lines**

|                | Concentration | RPMI8226 | MOLP8 | MM.1S | H929  |
|----------------|---------------|----------|-------|-------|-------|
| IL-6           | 0.1 ng/ml     | 75.5     | 74.8  | 96.8  | 90.0  |
|                | 1 ng/ml       | 57.8     | 65.3  | 83.1  | 78.2  |
|                | 10 ng/ml      | 58.5     | 62.2  | 76.6  | 78.5  |
| MIP-1 $\alpha$ | 1 ng/ml       | 107.5    | 101.5 | 99.5  | 106.5 |
|                | 10 ng/ml      | 107.6    | 99.8  | 99.5  | 98.3  |
|                | 100 ng/ml     | 106.8    | 94.7  | 100.8 | 97.8  |
| SDF-1 $\alpha$ | 1 ng/ml       | 110.1    | 93.5  | 102.0 | 94.6  |
|                | 10 ng/ml      | 106.6    | 98.1  | 103.9 | 90.6  |
|                | 100 ng/ml     | 106.1    | 104.0 | 104.0 | 91.0  |
| IL-1 $\beta$   | 1 ng/ml       | 102.3    | 102.9 | 106.3 | 90.5  |
|                | 5 ng/ml       | 100.1    | 110.7 | 103.6 | 93.7  |
|                | 25 ng/ml      | 102.0    | 113.8 | 105.3 | 96.6  |
| IL-8           | 5 ng/ml       | 99.6     | 101.4 | 96.0  | 103.2 |
|                | 25 ng/ml      | 99.3     | 101.1 | 100.9 | 100.5 |
|                | 100 ng/ml     | 99.6     | 108.3 | 99.8  | 110.1 |
| IGF-1          | 25 ng/ml      | 98.8     | 87.2  | 98.0  | 104.6 |
|                | 100 ng/ml     | 87.7     | 81.9  | 100.8 | 93.1  |
|                | 250 ng/ml     | 83.7     | 83.0  | 105.5 | 98.7  |
| TGF- $\beta$   | 0.2 ng/ml     | 125.1    | 89.1  | 97.1  | 104.9 |
|                | 1 ng/ml       | 137.9    | 87.1  | 98.7  | 100.9 |
|                | 5 ng/ml       | 134.5    | 87.8  | 100.3 | 93.0  |
| OSM            | 1 ng/ml       | 96.9     | 98.0  | 96.9  | 95.2  |
|                | 10 ng/ml      | 96.5     | 98.7  | 98.6  | 92.5  |
|                | 100 ng/ml     | 97.4     | 99.6  | 96.6  | 94.2  |
| LIF            | 1 ng/ml       | 96.2     | 96.7  | 98.4  | 98.5  |
|                | 10 ng/ml      | 96.1     | 99.1  | 98.3  | 98.5  |
|                | 100 ng/ml     | 97.5     | 99.5  | 98.0  | 101.5 |
| IL-10          | 1 ng/ml       | 76.8     | 97.2  | 99.2  | 101.1 |

|               |           |       |       |       |        |
|---------------|-----------|-------|-------|-------|--------|
|               | 10 ng/ml  | 65.7  | 95.1  | 98.3  | 98.2   |
|               | 100 ng/ml | 64.7  | 99.6  | 101.0 | 96.0   |
| IL-2          | 1 ng/ml   | 105.0 | 108.4 | 102.2 | 99.3   |
|               | 10 ng/ml  | 98.4  | 105.5 | 101.1 | 97.7   |
|               | 100 ng/ml | 99.8  | 102.8 | 99.2  | 92.6   |
| IFN- $\beta$  | 20 IU/ml  | 156.3 | 160.1 | 256.9 | 342.2  |
|               | 100 IU/ml | 235.9 | 190.2 | 478.8 | 731.9  |
|               | 500 IU/ml | 336.9 | 229.8 | 923.1 | 1060.7 |
| IFN- $\gamma$ | 20 IU/ml  | 130.5 | 140.5 | 185.7 | 138.8  |
|               | 100 IU/ml | 148.6 | 166.6 | 254.7 | 211.6  |
|               | 500 IU/ml | 167.0 | 169.5 | 312.0 | 311.0  |

IL-6, interleukin-6; MIP-1 $\alpha$ , macrophage inflammatory protein-1 $\alpha$ ; SDF-1 $\alpha$ , stromal cell-derived factor-1 $\alpha$ ; IL-1 $\beta$ , interleukin-1 $\beta$ ; IL-8, interleukin-8; IGF-1, insulin-like growth factor 1; TGF- $\beta$ , transforming growth factor- $\beta$ ; OSM, oncostatin-M; LIF, leukemia inhibitory factor; IL-10, interleukin-10; IL-2, interleukin-2; IFN- $\beta$ , interferon- $\beta$ ; IFN- $\gamma$ , interferon- $\gamma$ .

**Supplemental Table 6. p-value of student t-test in cytokine profiling in 4 MM cell lines**

|                | Concentration | RPMI8226 | MOLP8  | MM.1S  | H929   |
|----------------|---------------|----------|--------|--------|--------|
| IL-6           | 0.1 ng/ml     | 0.0002   | 0.0080 | 0.0007 | 0.0049 |
|                | 1 ng/ml       | 0.0001   | 0.0000 | 0.0003 | 0.0013 |
|                | 10 ng/ml      | 0.0000   | 0.0000 | 0.0002 | 0.0005 |
| MIP-1 $\alpha$ | 1 ng/ml       | 0.0105   | 0.5623 | 0.8810 | 0.0377 |
|                | 10 ng/ml      | 0.0098   | 0.9707 | 0.8883 | 0.6629 |
|                | 100 ng/ml     | 0.0658   | 0.1158 | 0.8087 | 0.1227 |
| SDF-1 $\alpha$ | 1 ng/ml       | 0.0355   | 0.0673 | 0.5484 | 0.0062 |
|                | 10 ng/ml      | 0.2317   | 0.7216 | 0.2954 | 0.0072 |
|                | 100 ng/ml     | 0.0182   | 0.1936 | 0.2848 | 0.0007 |
| IL-1 $\beta$   | 1 ng/ml       | 0.7635   | 0.4836 | 0.1463 | 0.0185 |
|                | 5 ng/ml       | 0.9712   | 0.0812 | 0.3251 | 0.0723 |
|                | 25 ng/ml      | 0.6902   | 0.0081 | 0.2074 | 0.2650 |
| IL-8           | 5 ng/ml       | 0.8578   | 0.3445 | 0.2565 | 0.5457 |
|                | 25 ng/ml      | 0.4660   | 0.5290 | 0.8505 | 0.9140 |
|                | 100 ng/ml     | 0.6332   | 0.1018 | 0.9695 | 0.1312 |
| IGF-1          | 25 ng/ml      | 0.5541   | 0.0178 | 0.4733 | 0.3411 |
|                | 100 ng/ml     | 0.0103   | 0.0286 | 0.5822 | 0.1991 |
|                | 250 ng/ml     | 0.0001   | 0.0005 | 0.0248 | 0.7776 |
| TGF- $\beta$   | 0.2 ng/ml     | 0.0016   | 0.0045 | 0.3546 | 0.3194 |
|                | 1 ng/ml       | 0.0004   | 0.0056 | 0.5857 | 0.8621 |
|                | 5 ng/ml       | 0.0001   | 0.0028 | 0.8121 | 0.1909 |
| OSM            | 1 ng/ml       | 0.0559   | 0.0635 | 0.1045 | 0.1514 |
|                | 10 ng/ml      | 0.0509   | 0.2374 | 0.6052 | 0.0688 |
|                | 100 ng/ml     | 0.1248   | 0.6223 | 0.0805 | 0.1044 |
| LIF            | 1 ng/ml       | 0.2045   | 0.1488 | 0.3564 | 0.5661 |
|                | 10 ng/ml      | 0.2016   | 0.3064 | 0.3376 | 0.6072 |
|                | 100 ng/ml     | 0.1953   | 0.5737 | 0.2241 | 0.6643 |
| IL-10          | 1 ng/ml       | 0.0002   | 0.0638 | 0.5994 | 0.7109 |
|                | 10 ng/ml      | 0.0012   | 0.0774 | 0.2835 | 0.5140 |

|               |           |        |        |        |        |
|---------------|-----------|--------|--------|--------|--------|
|               | 100 ng/ml | 0.0000 | 0.4472 | 0.6245 | 0.3201 |
| IL-2          | 1 ng/ml   | 0.3130 | 0.0038 | 0.4374 | 0.8798 |
|               | 10 ng/ml  | 0.6223 | 0.0857 | 0.7209 | 0.6942 |
|               | 100 ng/ml | 0.9471 | 0.5259 | 0.7923 | 0.1838 |
| IFN- $\beta$  | 20 IU/ml  | 0.0000 | 0.0037 | 0.0000 | 0.0004 |
|               | 100 IU/ml | 0.0006 | 0.0021 | 0.0001 | 0.0010 |
|               | 500 IU/ml | 0.0003 | 0.0025 | 0.0030 | 0.0002 |
| IFN- $\gamma$ | 20 IU/ml  | 0.0013 | 0.0046 | 0.0000 | 0.0000 |
|               | 100 IU/ml | 0.0001 | 0.0007 | 0.0002 | 0.0040 |
|               | 500 IU/ml | 0.0029 | 0.0129 | 0.0000 | 0.0010 |

IL-6, interleukin-6; MIP-1 $\alpha$ , macrophage inflammatory protein-1 $\alpha$ ; SDF-1 $\alpha$ , stromal cell-derived factor-1 $\alpha$ ; IL-1 $\beta$ , interleukin-1 $\beta$ ; IL-8, interleukin-8; IGF-1, insulin-like growth factor 1; TGF- $\beta$ , transforming growth factor- $\beta$ ; OSM, oncostatin-M; LIF, leukemia inhibitory factor; IL-10, interleukin-10; IL-2, interleukin-2; IFN- $\beta$ , interferon- $\beta$ ; IFN- $\gamma$ , interferon- $\gamma$ .

**Supplemental Table 7.** Significantly enriched pathways in CD38 high sorted cells in genome-scale CRISPR-Cas9 knockout screening

| <b>KEGG Pathway</b>                                      | <b>Number of related genes</b> | <b>p-value</b> |
|----------------------------------------------------------|--------------------------------|----------------|
| Jak-STAT signaling pathway                               | 7                              | 4.80E-03       |
| Signaling pathways regulating pluripotency of stem cells | 6                              | 1.80E-02       |
| Pancreatic cancer                                        | 4                              | 3.40E-02       |

**Supplemental Table 8.** GO analysis in CD38 high sorted cells in genome-scale CRISPR-Cas9 knockout screening

| <b>GO term</b>                                                       | <b>Number of related genes</b> | <b>p-value</b> |
|----------------------------------------------------------------------|--------------------------------|----------------|
| positive regulation of gene expression                               | 10                             | 5.60E-04       |
| long-chain fatty acid metabolic process                              | 4                              | 8.10E-04       |
| cholesterol metabolic process                                        | 5                              | 3.10E-03       |
| negative regulation of transcription from RNA polymerase II promoter | 15                             | 4.90E-03       |
| cellular lipid metabolic process                                     | 4                              | 5.70E-03       |
| vitamin K catabolic process                                          | 2                              | 1.80E-02       |
| menaquinone catabolic process                                        | 2                              | 1.80E-02       |
| cholesterol homeostasis                                              | 4                              | 1.90E-02       |
| somatic stem cell population maintenance                             | 4                              | 2.00E-02       |
| regulation of cell cycle                                             | 5                              | 2.50E-02       |
| phylloquinone catabolic process                                      | 2                              | 2.60E-02       |
| liver development                                                    | 4                              | 2.80E-02       |
| cytokine-mediated signaling pathway                                  | 5                              | 2.90E-02       |
| transcription, DNA-templated                                         | 26                             | 3.80E-02       |
| positive regulation of tyrosine phosphorylation of Stat3 protein     | 3                              | 4.50E-02       |

GO, gene ontology.
